# Supplementary material
Source: Springer Nature journal article supplement (https://www.springermedizin.de/resource/supplementary/13054_2010_8405_MOESM5_ESM.pdf/9731890)

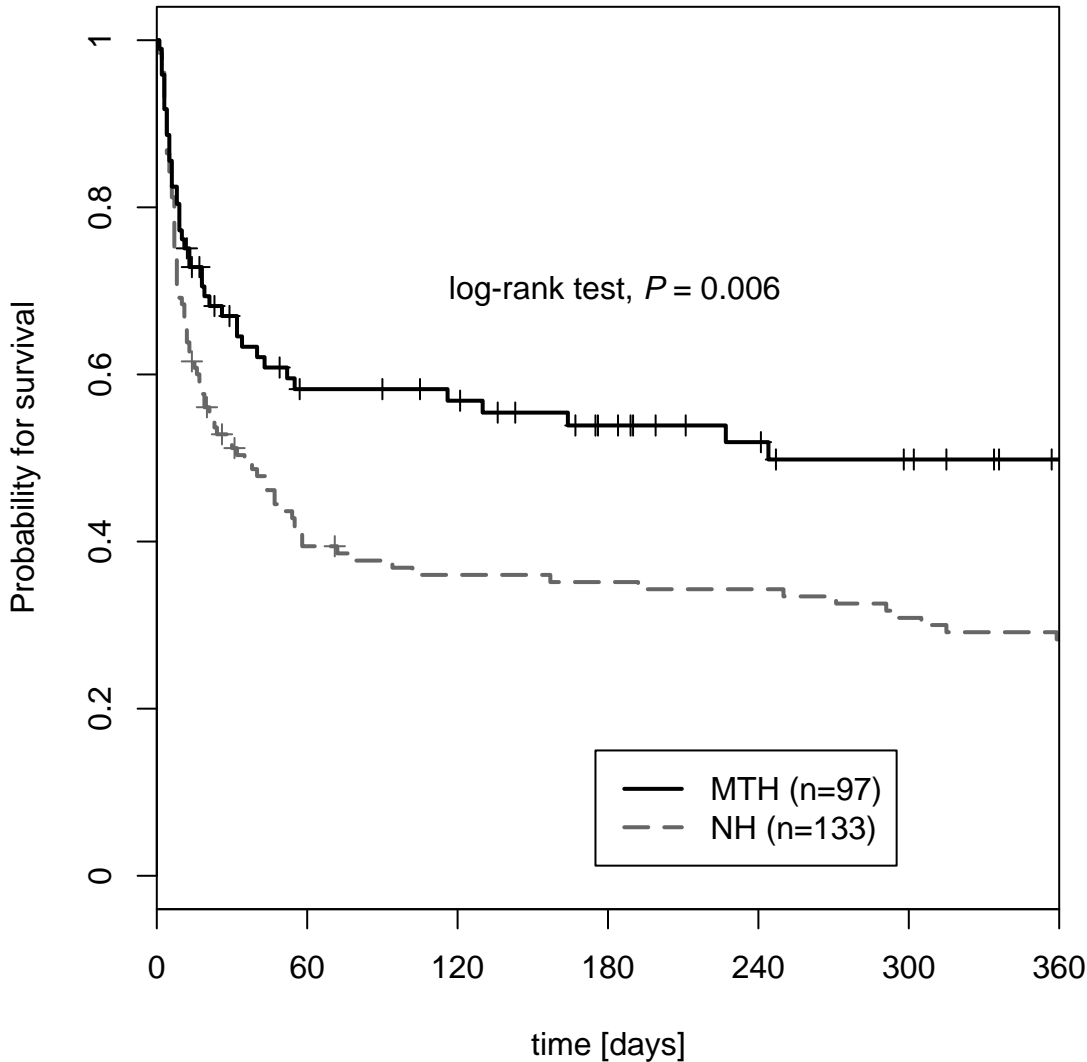

Supplement: MOESM5 [file 9731890]
